# Supplementary material
Source: HighWire-hosted journal article supplement (http://m.qualitysafety.bmj.com/highwire/filestream/147642/field_highwire_adjunct_files/1/bmjqs-2015-004828supp_appendix2.pdf)
Supplement: bmjqs-2015-004828supp_appendix2.pdf [file bmjqs-2015-004828supp_appendix2.pdf]

Appendix 2 Scales used by physician reviewers to classify the impact, causation and preventability of the adverse event; distribution of physical impairment and preventability results

|                                                                                                                                                                                                                                                                                                                                                    |                                 |                          |
|----------------------------------------------------------------------------------------------------------------------------------------------------------------------------------------------------------------------------------------------------------------------------------------------------------------------------------------------------|---------------------------------|--------------------------|
| <b>After due consideration of the clinical details of the patient’s management, irrespective of preventability, and your responses to the questions above; what level of confidence do you have that the health care management caused the injury? [a score of at least four was required to indicate causation through healthcare management]</b> |                                 |                          |
| 1. Virtually no evidence of management causation                                                                                                                                                                                                                                                                                                   |                                 |                          |
| 2. Slight to modest evidence of management causation                                                                                                                                                                                                                                                                                               |                                 |                          |
| 3. Management causation not likely (less than 50/50, but “close call”)                                                                                                                                                                                                                                                                             |                                 |                          |
| 4. Management causation more likely (more than 50/50, but “close call”)                                                                                                                                                                                                                                                                            |                                 |                          |
| 5. Moderate to strong evidence of management causation                                                                                                                                                                                                                                                                                             |                                 |                          |
| 6. Virtually certain evidence of management causation                                                                                                                                                                                                                                                                                              |                                 |                          |
| <b>Based on the evidence in the medical record, how would you judge the degree of physical impairment attributable to the adverse event on the day of discharge?</b>                                                                                                                                                                               | <b>INAES event distribution</b> |                          |
|                                                                                                                                                                                                                                                                                                                                                    | <b>Unweighted</b>               | <b>Weighted (95% CI)</b> |
| None                                                                                                                                                                                                                                                                                                                                               | 12.6%                           | 13.2%<br>(9.2%-18.6%)    |
| Minimal impairment, or recovery in 1 month, or both                                                                                                                                                                                                                                                                                                | 32.4%                           | 33.6%<br>(26.2%-41.9%)   |
| Moderate impairment, recovery in 1-6 months                                                                                                                                                                                                                                                                                                        | 21.9%                           | 20.8%<br>(15.9%-26.7%)   |
| Moderate impairment, recovery in 6-12 months                                                                                                                                                                                                                                                                                                       | 5.7%                            | 5.0%<br>(2.6%-9.1%)      |
| Permanent impairment, degree of disability ≤ 50%                                                                                                                                                                                                                                                                                                   | 9.3%                            | 8.8%<br>(5.1%-15.0%)     |
| Permanent impairment, degree of disability > 50%                                                                                                                                                                                                                                                                                                   | 1.2%                            | 1.1%<br>(0.3%-4.4%)      |
| Death                                                                                                                                                                                                                                                                                                                                              | 6.1%                            | 6.7%<br>(3.3%-12.9%)     |
| Unable to determine                                                                                                                                                                                                                                                                                                                                | 10.9%                           | 10.9%<br>(6.2%-18.5%)    |
| <b>Rate on a 6 point scale your confidence in the evidence for preventability [an adverse event was considered ‘preventable’ if it had a score of four or more]</b>                                                                                                                                                                                | <b>INAES event distribution</b> |                          |
|                                                                                                                                                                                                                                                                                                                                                    | <b>Unweighted</b>               | <b>Weighted (95% CI)</b> |
| 1. Virtually no evidence of preventability                                                                                                                                                                                                                                                                                                         | 8.5%                            | 9.6%<br>(5.0%-17.6%)     |
| 2. Slight to modest evidence for preventability                                                                                                                                                                                                                                                                                                    | 3.6%                            | 3.6%<br>(1.4%-8.7%)      |
| 3. Preventability not quite likely; less than 50-50 but close call                                                                                                                                                                                                                                                                                 | 15.4%                           | 14.1%<br>(8.8%-22.0%)    |
| 4. Preventability more than likely; more than 50-50 but close call                                                                                                                                                                                                                                                                                 | 38.5%                           | 39.7%<br>(33.3%-46.4%)   |
| 5. Strong evidence for preventability                                                                                                                                                                                                                                                                                                              | 25.9%                           | 24.8%<br>(17.4%-34.0%)   |
| 6. Virtually certain evidence for preventability                                                                                                                                                                                                                                                                                                   | 8.1%                            | 8.3%<br>(4.2%-15.5%)     |
